# Supplementary material
Source: ML conference proceedings conference paper supplement (https://openreview.net/forum?id=tRmH7u0trdf)
Supplement: supplementary_material [file attachment]

Start

Shape=  
Cylinder

Shape = Cube

Angle = left

Angle = right

Flr. Color =  
Blue/Red

Flr. Color =  
Yellow/Green

Obj. Color =  
Blue/Red

Obj. Color =  
Yellow/Green

Obj. Color =  
Blue/Red

Obj. Color =  
Yellow/Green

Angle = left

Angle=right

Angle=left

Angle=right

y=0

y=1

y=2

y=3

y=4

y=5

y=6

y=7
