# Supplementary material
Source: ML conference proceedings conference paper supplement (https://openreview.net/forum?id=tRmH7u0trdf)

prediction: **jack-o-lantern**  
true class: **traffic light**

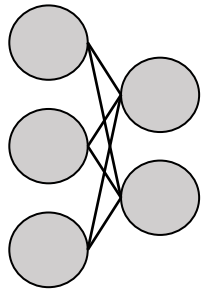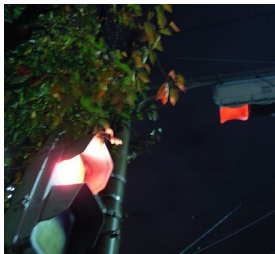

concept importance for prediction  
**jack-o-lantern:**

dependencies

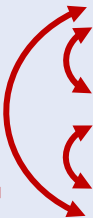

darkness

fire, red

pumpkins

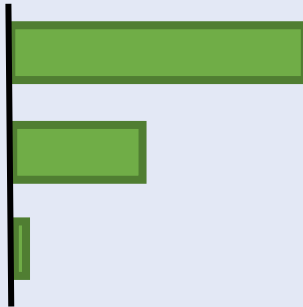

examples of  
**jack-o-lantern**

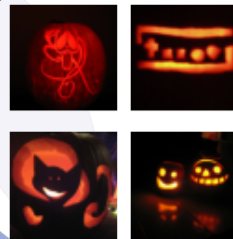

Supplement: supplementary_material [file attachment]
