# Supplementary material
Source: ML conference proceedings conference paper supplement (https://openreview.net/forum?id=tRmH7u0trdf)

Prediction: **jack-o-lantern**,  
True class: **traffic light**

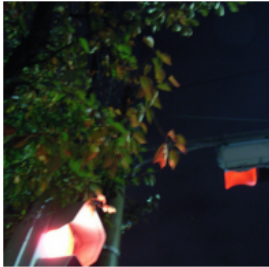

| No. | Top Concepts ( <b>jack-o-lantern</b> )                                            | Weight | Act. |
|-----|-----------------------------------------------------------------------------------|--------|------|
| 2   | candles, burning, flame, fire, fires (rating: 2.28)                               | 0.24   | 1.92 |
| 4   | batting helmet, patella, spinal column, hindquarter, passenger car (rating: 2.09) | 0.14   | 1.68 |
| 8   | birds, flamingo, new world blackbird, duck, october (rating: 2.04)                | 0.22   | 0.74 |

| No. | Top Concepts ( <b>traffic light</b> )                                              | Weight | Act. |
|-----|------------------------------------------------------------------------------------|--------|------|
| 1   | stoplight, traffic light, traffic, boulevard, transportation system (rating: 2.04) | 0.28   | 1.04 |
| 2   | candles, burning, flame, fire, fires (rating: 2.28)                                | 0.15   | 1.92 |
| 4   | towers, buildings, condos, lamppost, building (rating: 1.93)                       | 0.19   | 1.18 |

**candles, burning, flame, fire, fires (rating: 2.28)**

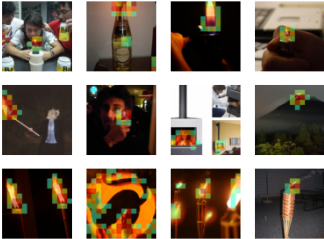

Supplement: supplementary_material [file attachment]
