# Supplementary material
Source: ML conference proceedings conference paper supplement (https://openreview.net/forum?id=tRmH7u0trdf)

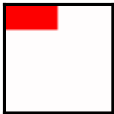

$z_1$

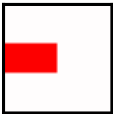

$z_2$

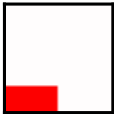

$z_3$

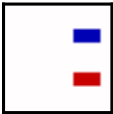

$z_4$

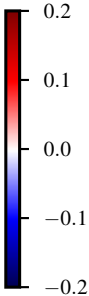

Supplement: supplementary_material [file attachment]

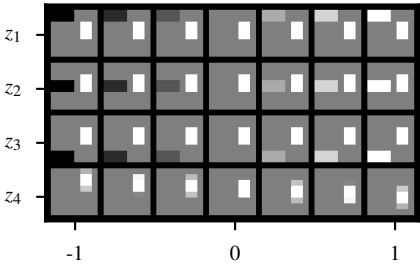

Supplement: supplementary_material [file attachment]

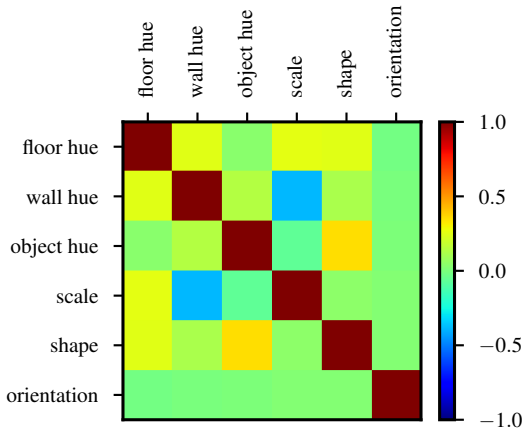

Supplement: supplementary_material [file attachment]

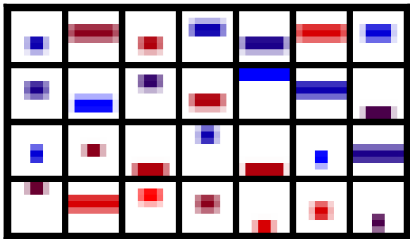

Supplement: supplementary_material [file attachment]

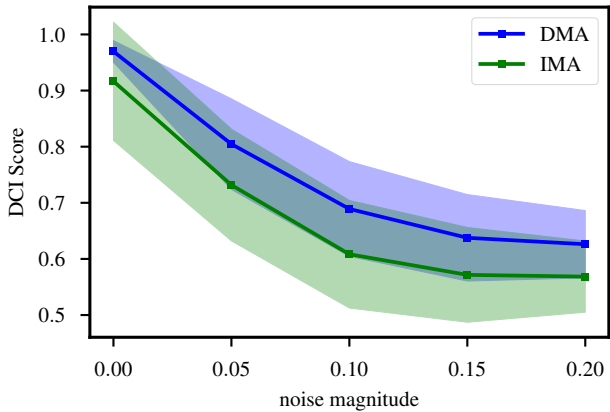

Supplement: supplementary_material [file attachment]

floor hue  
wall hue  
object hue  
scale  
shape  
orientation

$h_1$

$h_2$

$h_3$

$h_4$

$h_5$

$h_6$

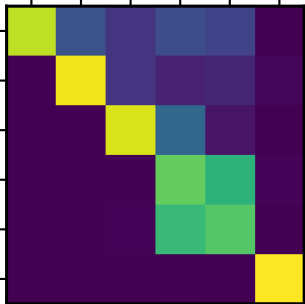

Supplement: supplementary_material [file attachment]

$-$  [Attribute] primary color: white  $+$

---

GT: 11.54

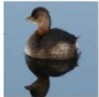

GT: 0.00

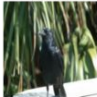

GT: 6.63

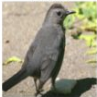

GT: 0.00

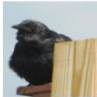

GT: 3.12

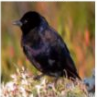

GT 75.46

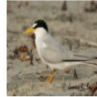

GT 77.50

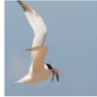

GT 75.46

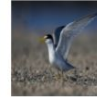

GT 38.51

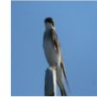

GT 86.18

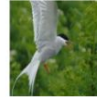

Supplement: supplementary_material [file attachment]

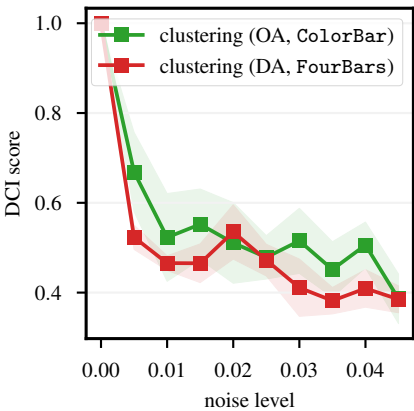

Supplement: supplementary_material [file attachment]

Disentanglement score (DCI)=0.70

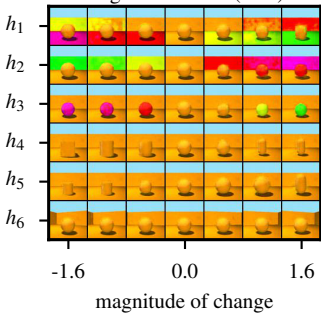

Supplement: supplementary_material [file attachment]

DCI

0.75

0.50

0.25

0.0

0.2

0.4

0.6

0.8

1.0

Correlation strength

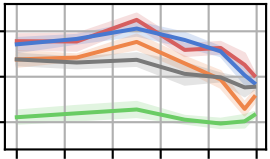

Supplement: supplementary_material [file attachment]

(c)  $s = 1$

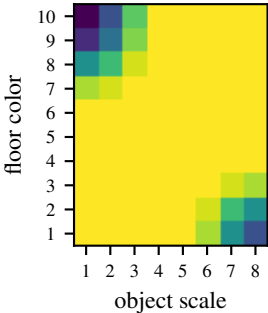

Supplement: supplementary_material [file attachment]

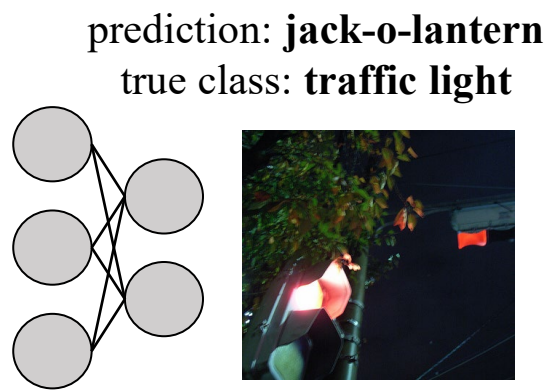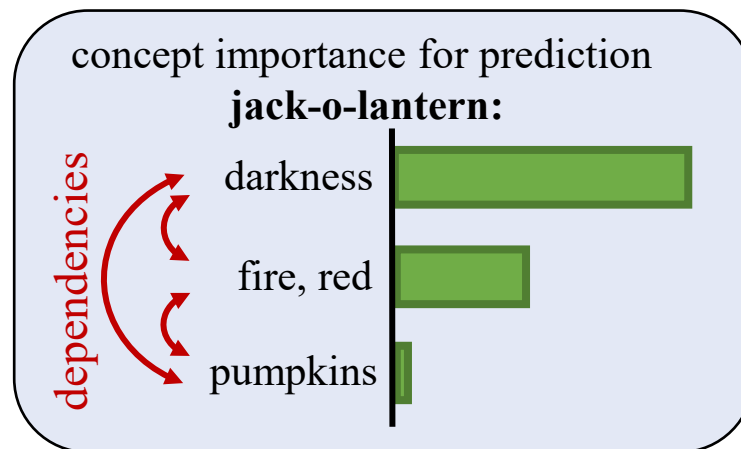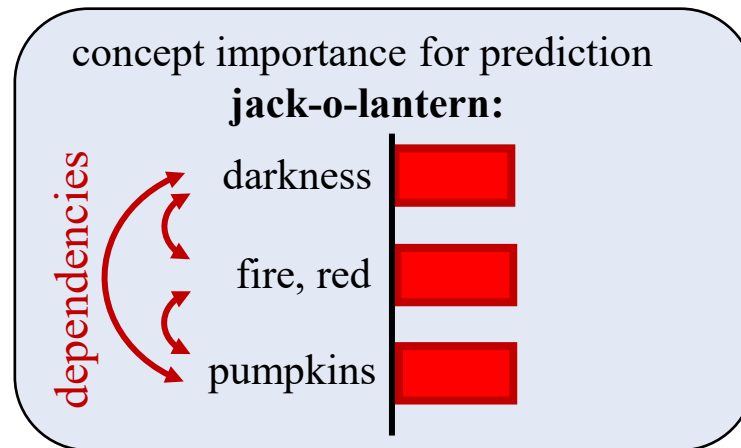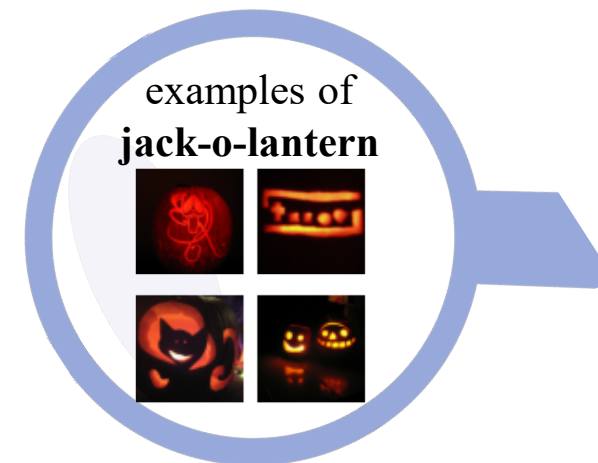

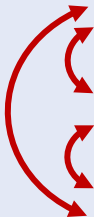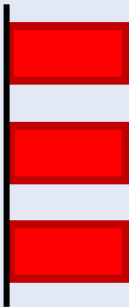

Supplement: supplementary_material [file attachment]

(d)  $\rho = 0$

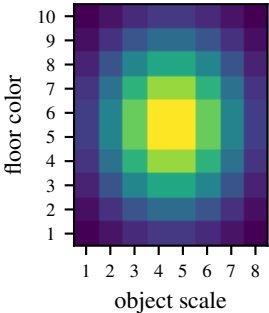

Supplement: supplementary_material [file attachment]

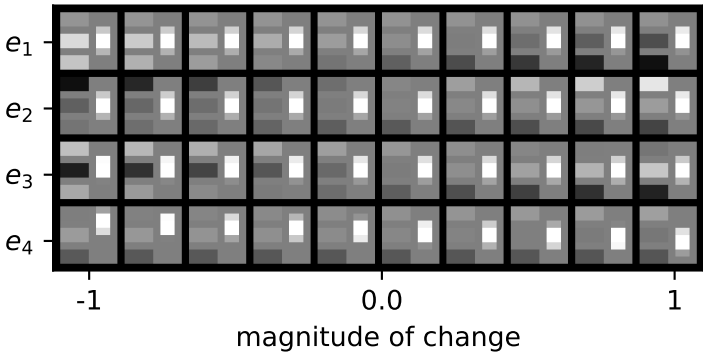

Supplement: supplementary_material [file attachment]

DCI

0.75  
0.50  
0.25

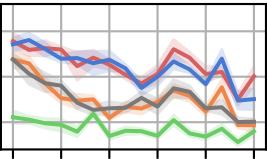

Number of correlated pairs

Supplement: supplementary_material [file attachment]

Disentanglement score (DCI)=0.58

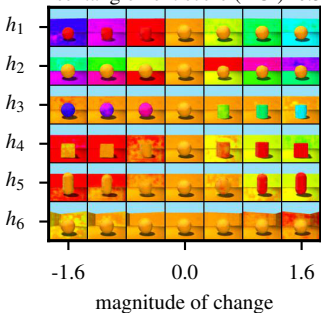

Supplement: supplementary_material [file attachment]



Supplement: supplementary_material [file attachment]

Disentanglement score (DCI)=0.67

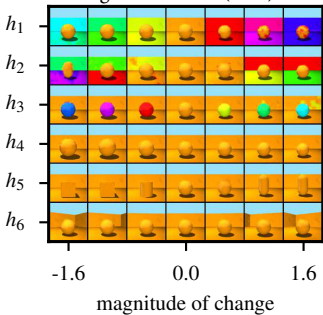

Supplement: supplementary_material [file attachment]

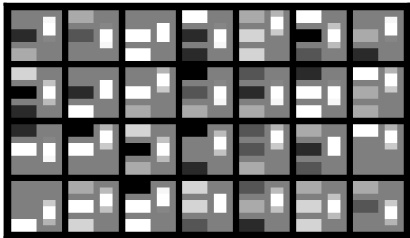

Supplement: supplementary_material [file attachment]

DCI score=0.74

$m_1$

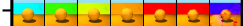

$m_2$

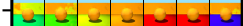

$m_3$

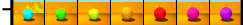

$m_4$

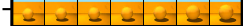

$m_5$

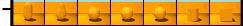

$m_6$

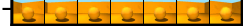

Supplement: supplementary_material [file attachment]

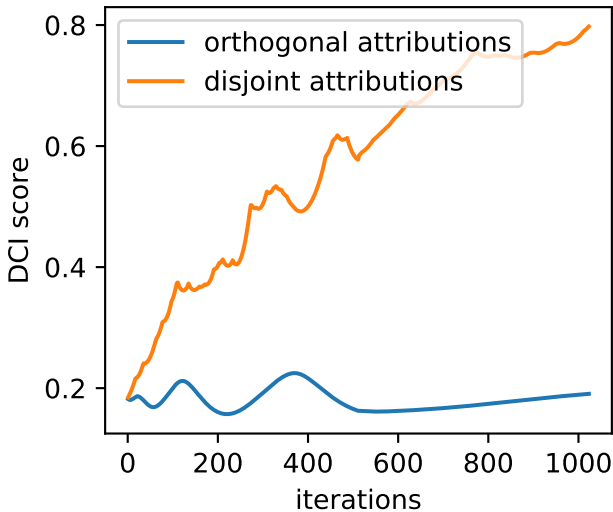

Supplement: supplementary_material [file attachment]

Disentanglement score (DCI)=0.57

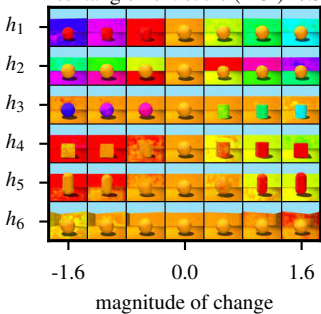

Supplement: supplementary_material [file attachment]

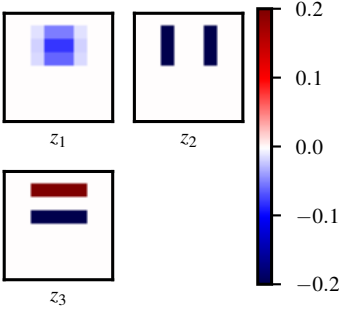

Supplement: supplementary_material [file attachment]

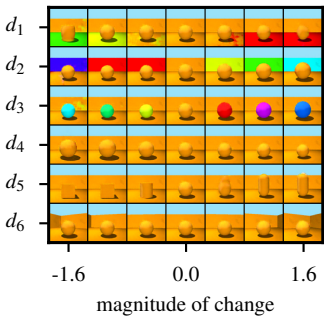

Supplement: supplementary_material [file attachment]

(e)  $\rho = 0.5$

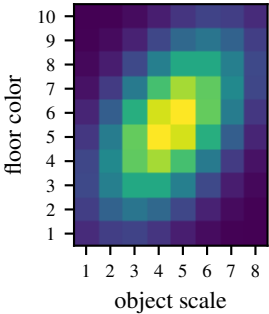

Supplement: supplementary_material [file attachment]

floor hue    wall hue    object hue    scale    shape    orientation

$h_1$

$h_2$

$h_3$

$h_4$

$h_5$

$h_6$

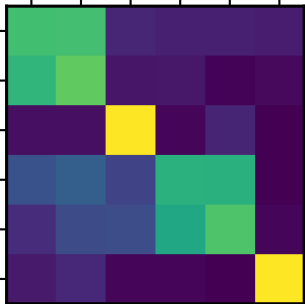

Supplement: supplementary_material [file attachment]

Disentanglement score (DCI)=0.62

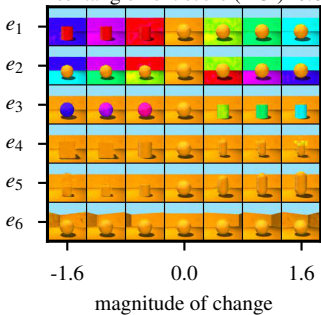

Supplement: supplementary_material [file attachment]

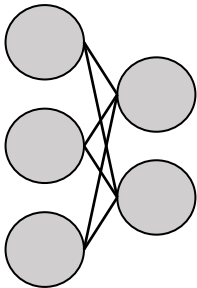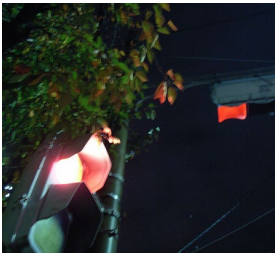

Supplement: supplementary_material [file attachment]

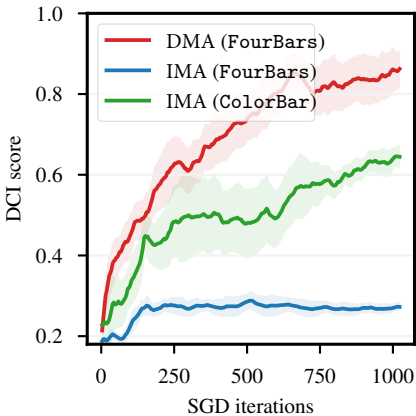

Supplement: supplementary_material [file attachment]

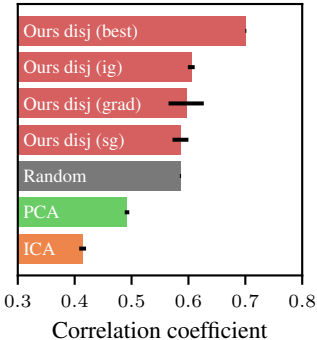

Supplement: supplementary_material [file attachment]

floor hue   wall hue   object hue   scale   shape   orientation

$e_1$

$e_2$

$e_3$

$e_4$

$e_5$

$e_6$

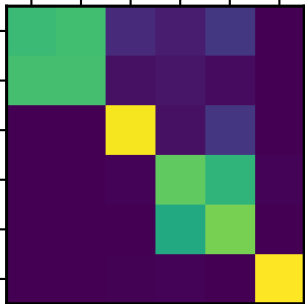

Supplement: supplementary_material [file attachment]

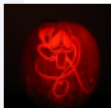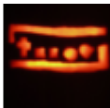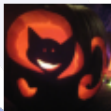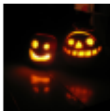

Supplement: supplementary_material [file attachment]

(f)  $\rho = 0.85$

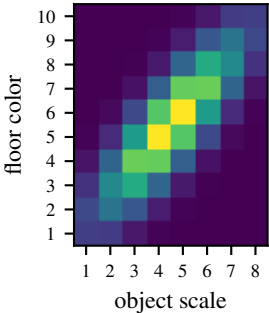

Supplement: supplementary_material [file attachment]

(b)  $s = 0.4$

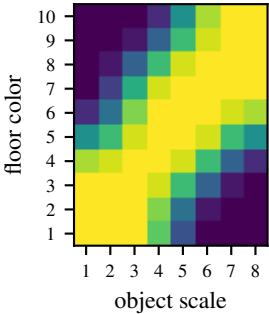

Supplement: supplementary_material [file attachment]

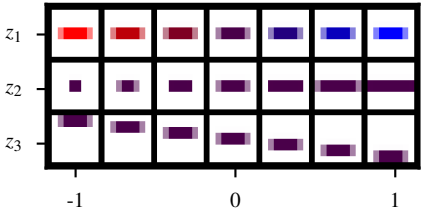

Supplement: supplementary_material [file attachment]

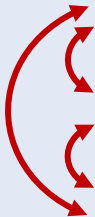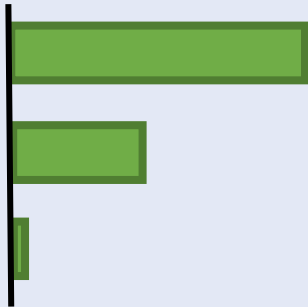

Supplement: supplementary_material [file attachment]
